# Supplementary material for: Ionic liquid 1,3-disulfonic acid imidazolium hydrogen sulfate: a novel and highly efficient catalyst for the preparation of 1-carbamatoalkyl-2-naphthols and 1-amidoalkyl-2-naphthols
Source: Royal Society of Chemistry journal article supplement (doi:10.1039/c2ra20679j), 2012-01-01
Supplement: c2ra20679j.pdf [file c2ra20679j.pdf]

## Supplementary Information

### **Ionic liquid 1,3-disulfonic acid imidazolium hydrogen sulfate: a novel and highly efficient catalyst for the preparation of 1-carbamatoalkyl-2-naphthols and 1-amidoalkyl-2-naphthols**

Abdolkarim Zare,\*<sup>a</sup> Ahmad Reza Moosavi-Zare\*<sup>b</sup> and Mohammad Mehdi Ahmadzadeh<sup>a</sup>

<sup>a</sup>Department of Chemistry, Payame Noor University, PO BOX 19395-4697, Tehran, Iran. E-mail: [abdolkarimzare@yahoo.com](mailto:abdolkarimzare@yahoo.com); Fax: +98 771 5559489; Tel: +98 771 5559488

<sup>b</sup>Faculty of Chemistry, Bu-Ali Sina University, Hamedan 6517838683, Iran. E-mail: [moosavizare@yahoo.com](mailto:moosavizare@yahoo.com); Fax: +98 811 8258407; Tel: +98 771 8282807

### **Experimental**

All chemicals were purchased from Merck, Aldrich or Fluka Chemical Companies. All known compounds were identified by comparison of their melting points and NMR data with those reported in the literature. The <sup>1</sup>H NMR (300 or 400 MHz) and <sup>13</sup>C NMR (75 or 100 MHz) were run on Bruker Avance DPX FT-NMR spectrometers (δ in ppm). Mass spectra were obtained with Shimadzu GC-MS-QP 1100 EX model. Melting points were recorded on a Büchi B-545 apparatus in open capillary tubes.

### **Selected spectral data of the products**

#### **Methyl (2-hydroxynaphthalen-1-yl)(phenyl)methylcarbamate (1a)**

<sup>1</sup>H NMR (400 MHz, DMSO-d<sub>6</sub>): δ 3.59 (s, 3H), 6.90 (d, *J* = 8.8 Hz, 1H), 7.17-7.19 (m, 1H), 7.24-7.30 (m, 6H), 7.41 (t, *J* = 7.6 Hz, 1H), 7.68 (d, *J* = 5.6 Hz, 1H), 7.77-7.83 (m, 2H), 7.95 (d, *J* = 8.0 Hz, 1H), 10.14 (s, 1H); <sup>13</sup>C NMR (100 MHz, DMSO-d<sub>6</sub>): δ 50.8, 52.1, 118.9, 119.3, 123.0, 126.5, 126.8, 127.0, 128.5, 128.8, 129.0, 129.7, 132.5, 142.8, 153.3, 157.0.

#### **Methyl (2-hydroxynaphthalen-1-yl)(4-nitrophenyl)methylcarbamate (1c)**

<sup>1</sup>H NMR (400 MHz, DMSO-d<sub>6</sub>): δ 3.62 (s, 3H), 6.99 (d, *J* = 8.4 Hz, 1H), 7.24-7.32 (m, 2H), 7.53 (t, *J* = 8.0 Hz, 1H), 7.50 (d, *J* = 8.8 Hz, 2H), 7.83 (t, *J* = 8.4 Hz, 2H), 7.88 (s, 1H), 7.93 (d, *J* = 6.4 Hz, 1H), 8.16 (d, *J* = 8.8 Hz, 2H), 10.25 (s, 1H); <sup>13</sup>C NMR (100 MHz, DMSO-d<sub>6</sub>): δ 50.7, 52.2, 118.4, 118.8, 123.1, 123.2, 123.8, 127.3, 127.6, 128.8, 129.1, 130.3, 132.4, 146.5, 151.1, 153.6, 157.2.

**Methyl (4-bromophenyl)(2-hydroxynaphthalen-1-yl)methylcarbamate (1e)**

$^1\text{H}$  NMR (400 MHz, DMSO- $d_6$ ):  $\delta$  3.59 (s, 3H), 6.85 (d,  $J$  = 8.8 Hz, 1H), 7.19 (d,  $J$  = 8.0 Hz, 1H), 7.23-7.31 (m, 2H), 7.41 (t,  $J$  = 8.0 Hz, 2H), 7.47 (d,  $J$  = 8.4 Hz, 2H), 7.72 (d,  $J$  = 5.2 Hz, 1H), 7.78-7.83 (m, 2H), 7.91 (d,  $J$  = 7.2 Hz, 1H), 10.18 (s, 1H);  $^{13}\text{C}$  NMR (100 MHz, DMSO- $d_6$ ):  $\delta$  50.4, 52.1, 118.8, 118.9, 119.9, 123.0, 127.1, 128.7, 128.8, 129.0, 130.0, 131.4, 132.4, 142.4, 153.4, 157.1; MS ( $m/z$ ): 386 ( $\text{M}^+$ ).

**N-[(2-Hydroxynaphthalen-1-yl)(4-bromophenyl)methyl]acetamide (2d)**

$^1\text{H}$  NMR (300 MHz, DMSO- $d_6$ ):  $\delta$  1.98 (s, 3H), 6.98-7.34 (m, 8H), 7.61-7.67 (m, 2H), 7.86 (d,  $J$  = 10.1 Hz, 1H), 8.27 (d,  $J$  = 8.1 Hz, 1H), 9.74 (s, 1H);  $^{13}\text{C}$  NMR (75 MHz, DMSO- $d_6$ ):  $\delta$  23.7, 46.5, 117.8, 118.7, 121.2, 122.4, 123.8, 126.9, 128.4, 128.7, 129.3, 130.2, 131.0, 133.2, 139.8, 152.6, 168.4.

**N-[(2-Hydroxynaphthalen-1-yl)(*p*-tolyl)methyl]acrylamide (2f)**

$^1\text{H}$  NMR (300 MHz, DMSO- $d_6$ ):  $\delta$  2.21 (s, 3H), 5.59 (d,  $J$  = 9.6 Hz, 1H), 6.12 (d,  $J$  = 16.8 Hz, 1H), 6.59 (dd,  $J$  = 15.9, 10.2 Hz, 1H), 7.04-7.35 (m, 8H), 7.74-7.85 (m, 3H), 8.68 (d,  $J$  = 7.5 Hz, 1H), 10.00 (s, 1H);  $^{13}\text{C}$  NMR (75 MHz, DMSO- $d_6$ ):  $\delta$  21.0, 49.5, 118.9, 119.1, 122.8, 123.8, 126.0, 126.5, 126.8, 128.9, 129.3, 131.8, 132.3, 135.7, 139.6, 153.7, 164.9.

**N-[(2-Hydroxynaphthalen-1-yl)(4-methoxyphenyl)methyl]benzamide (2i)**

$^1\text{H}$  NMR (400 MHz, DMSO- $d_6$ ):  $\delta$  3.69 (s, 3H), 6.86 (d,  $J$  = 8.4 Hz, 2H), 7.24-7.34 (m, 5H), 7.47-7.57 (m, 4H), 7.80-7.89 (m, 4H), 8.12 (d,  $J$  = 8.4 Hz, 2H), 10.39 (s, 1H);  $^{13}\text{C}$  NMR (100 MHz, DMSO- $d_6$ ):  $\delta$  49.4, 55.5, 114.1, 118.9, 119.2, 123.2, 127.2, 127.6, 127.9, 128.2, 128.7, 128.9, 129.0, 129.7, 131.8, 132.7, 134.3, 134.9, 153.5, 158.5, 166.0.
